# Supplementary material for: A Comprehensive Characterization of Empirical Parameterizations for OH Exposure in the Aerodyne Potential Aerosol Mass Oxidation Flow Reactor (PAM-OFR)
Source: Copernicus journal article supplement (doi:10.5194/egusphere-2024-2721), 2024-09-30
Supplement: Supplementary file 1 [file egusphere-2024-2721-supplement.pdf]

Supplementary materials for

## **A Comprehensive Characterization of Empirical Parameterizations for OH Exposure in the Aerodyne Potential Aerosol Mass Oxidation Flow Reactor (PAM-OFR)**

- 5 Qianying Liu<sup>1,2</sup>, Dan Dan Huang<sup>2,\*</sup>, Andrew T. Lambe<sup>3</sup>, Shengrong Lou<sup>2</sup>, Lulu Zeng<sup>1</sup>, Yuhang Wu<sup>2</sup>,  
Congyan Huang<sup>2</sup>, Shikang Tao<sup>2</sup>, Xi Cheng<sup>4</sup>, Qi Chen<sup>5</sup>, Ka In Hoi<sup>1</sup>, Hongli Wang<sup>2</sup>, Kai Meng Mok<sup>1</sup>,  
Cheng Huang<sup>2,6</sup>, Yong Jie Li<sup>1,\*</sup>

<sup>1</sup>Department of Civil and Environmental Engineering, Department of Ocean Science and Technology, and Centre for Regional Oceans, Faculty of Science and Technology, University of Macau, Taipa, Macau SAR, 999078, China

- 10 <sup>2</sup>State Environmental Protection Key Laboratory of Formation and Prevention of Urban Air Pollution Complex, Shanghai Academy of Environmental Sciences, Shanghai, 200233, China

<sup>3</sup>Aerodyne Research Inc., Billerica, Massachusetts, 01821, United States

<sup>4</sup>School of Chemical and Environmental Engineering, China University of Mining and Technology (Beijing), Beijing 100083, China

- 15 <sup>5</sup>State Key Joint Laboratory of Environmental Simulation and Pollution Control, BIC-ESAT and IJRC, College of Environmental Sciences and Engineering, Peking University, Beijing, China

<sup>6</sup>State Ecology and Environment Scientific Observation and Research Station for the Yangtze River Delta at Dianshan Lake, Shanghai Environmental Monitoring Center, Shanghai, 200030, China

*Correspondence to:* Dan Dan Huang ([huangdd@saes.sh.cn](mailto:huangdd@saes.sh.cn)), Yong Jie Li ([yongjieli@um.edu.mo](mailto:yongjieli@um.edu.mo))

## List of the supporting information:

|    |                                                                                                                                                                                                                                                                                                                                                                                                                                                                                                                                                                                                                                                                                                                                                                                                                                                               |          |
|----|---------------------------------------------------------------------------------------------------------------------------------------------------------------------------------------------------------------------------------------------------------------------------------------------------------------------------------------------------------------------------------------------------------------------------------------------------------------------------------------------------------------------------------------------------------------------------------------------------------------------------------------------------------------------------------------------------------------------------------------------------------------------------------------------------------------------------------------------------------------|----------|
|    | Table S1: List of OFR185 trace-gas decay experiments under different conditions. SO <sub>2</sub> or CO was used as the source of external OH reactivity (OHR <sub>ext</sub> ). Each set of experiments was performed under 5–9 lamp intensity settings. ....                                                                                                                                                                                                                                                                                                                                                                                                                                                                                                                                                                                                  | 3        |
| 25 | Table S2: List of OFR254 trace-gas decay experiments under different conditions. SO <sub>2</sub> or CO was used as the source of OHR <sub>ext</sub> . Each set of experiments was performed under 5–9 lamp intensity settings. ....                                                                                                                                                                                                                                                                                                                                                                                                                                                                                                                                                                                                                           | 4        |
|    | Table S3: In OFR185 mode, the parameters $a$ – $f$ for the OH <sub>exp, est</sub> estimation were obtained from different data sets. ....                                                                                                                                                                                                                                                                                                                                                                                                                                                                                                                                                                                                                                                                                                                     | 6        |
|    | Table S4: In OFR254 mode, the parameters $a$ – $c$ of the OH <sub>exp, est</sub> estimation were obtained from different data sets. ....                                                                                                                                                                                                                                                                                                                                                                                                                                                                                                                                                                                                                                                                                                                      | 7        |
|    | <b>Figures</b> .....                                                                                                                                                                                                                                                                                                                                                                                                                                                                                                                                                                                                                                                                                                                                                                                                                                          | <b>8</b> |
| 30 | Figure S1: The schematics of the PAM-OFR experimental setup for trace-gas decay experiments in (a) OFR185 mode and (b) OFR254 mode. ....                                                                                                                                                                                                                                                                                                                                                                                                                                                                                                                                                                                                                                                                                                                      | 8        |
|    | Figure S2: The examples of a set of experiments conducted in (a) the OFR185 mode and (b) the OFR254 mode, respectively. A set of experiments was operated with light voltage settings stepping decreasing from 10V to 0V. The highlighted areas indicate the periods when all conditions had reached a steady state and the tracer gas was sampled. ....                                                                                                                                                                                                                                                                                                                                                                                                                                                                                                      | 9        |
| 35 | Figure S3: The regression results of OH <sub>exp, est</sub> and OH <sub>exp, dec</sub> when variations occurred in (a1–a3) residence time, (b1–b3) water vapor mixing ratio, and (c1–c3) output O <sub>3</sub> concentration under atmospheric relevant OHR <sub>ext</sub> level (4–23 s <sup>-1</sup> ). Compared to panels a1, b1, and c1, panels a2, b2, and c2 respectively incorporated additional data points with lower $t$ , H <sub>2</sub> O, and O <sub>3, out</sub> values, but still utilized the fitting parameters $a$ – $f$ obtained from the higher condition range to estimate OH <sub>exp, est</sub> . In panels a3, b3, and c3, all data points within the extended condition range were used to re-fit the parameters $a$ – $f$ , which were employed to estimate OH <sub>exp, est</sub> . ....                                           | 10       |
| 40 | Figure S4: (a1–a3) The variations of $c \times \text{OHR}_{\text{ext}}^d \times \log(\text{O}_{3, \text{out}} \times 180/t)$ , $e \times \text{OHR}_{\text{ext}}^f \times [\log(\text{O}_{3, \text{out}} \times 180/t)]^2$ and their sum with respect to OHR <sub>ext</sub> when using the fitted values of $c$ – $f$ (–0.13922, 0.26786, 0.0026332, 0.4917) obtained from the low OHR <sub>ext</sub> data points. (b1–b3) The variations of $c \times \text{OHR}_{\text{ext}}^d \times \log(\text{O}_{3, \text{out}} \times 180/t)$ , $e \times \text{OHR}_{\text{ext}}^f \times [\log(\text{O}_{3, \text{out}} \times 180/t)]^2$ and their sum with respect to OHR <sub>ext</sub> when using the fitted values of $c$ – $f$ (–0.079114, 0.36805, 0.0041654, 0.38722) obtained from the data points with a wider range of OHR <sub>ext</sub> condition. .... | 11       |
| 45 |                                                                                                                                                                                                                                                                                                                                                                                                                                                                                                                                                                                                                                                                                                                                                                                                                                                               |          |

Tables.

50 **Table S1:** List of OFR185 trace-gas decay experiments under different conditions. SO<sub>2</sub> or CO was used as the source of external OH reactivity (OHR<sub>ext</sub>). Each set of experiments was performed under 5–9 lamp intensity settings.

| Experiment ID | Species         | Initial concentration(ppb) | OHR <sub>ext</sub> (s <sup>-1</sup> ) | Residence time (s) | Water vapor mixing ratio (%) |
|---------------|-----------------|----------------------------|---------------------------------------|--------------------|------------------------------|
| 1             | SO <sub>2</sub> | 182.8                      | 4.27                                  | 33.3               | 0.58                         |
| 2             |                 | 191.0                      | 4.46                                  | 33.3               | 0.63                         |
| 3             |                 | 193.2                      | 4.52                                  | 33.3               | 0.64                         |
| 4             |                 | 274.0                      | 6.40                                  | 99.8               | 0.79                         |
| 5             |                 | 291.0                      | 6.80                                  | 99.8               | 0.69                         |
| 6             |                 | 331.0                      | 7.74                                  | 295.6              | 1.60                         |
| 7             |                 | 366.0                      | 8.55                                  | 181.4              | 1.55                         |
| 8             |                 | 379.4                      | 8.87                                  | 33.3               | 0.63                         |
| 9             |                 | 380.3                      | 8.89                                  | 33.3               | 1.05                         |
| 10            |                 | 383.1                      | 8.96                                  | 33.3               | 0.87                         |
| 11            |                 | 489.4                      | 11.44                                 | 61.4               | 0.62                         |
| 12            |                 | 513.0                      | 11.99                                 | 199.5              | 0.66                         |
| 13            |                 | 650.0                      | 15.19                                 | 181.4              | 2.72                         |
| 14            |                 | 750.0                      | 17.53                                 | 181.4              | 1.98                         |
| 15            |                 | 789.1                      | 18.45                                 | 33.3               | 0.74                         |
| 16            |                 | 973.2                      | 22.75                                 | 33.3               | 1.19                         |
| 17            |                 | 8556.4                     | 197.98                                | 61.4               | 0.52                         |
| 18            |                 | 8556.4                     | 200.00                                | 33.3               | 0.38                         |
| 19            |                 | 8718.6                     | 203.79                                | 33.3               | 0.53                         |
| 20            | CO              | 10247.8                    | 60.58                                 | 33.3               | 1.15                         |
| 21            |                 | 12298.2                    | 72.70                                 | 33.3               | 0.86                         |
| 22            |                 | 103238.4                   | 610.27                                | 33.3               | 0.95                         |
| 23            |                 | 103852.8                   | 613.91                                | 33.3               | 0.86                         |
| 24            |                 | 207445.7                   | 1226.27                               | 33.3               | 0.97                         |
| 25            |                 | 207496.6                   | 1226.58                               | 33.3               | 0.89                         |

**Table S2:** List of OFR254 trace-gas decay experiments under different conditions. SO<sub>2</sub> or CO was used as the source of OHR<sub>ext</sub>. Each set of experiments was performed under 5–9 lamp intensity settings.

| Experiment ID | Species         | Initial concentration (ppb) | OHR <sub>ext</sub> (s <sup>-1</sup> ) | Input O <sub>3</sub> concentration (ppm) | Residence time (s) | Water vapor mixing ratio (%) |
|---------------|-----------------|-----------------------------|---------------------------------------|------------------------------------------|--------------------|------------------------------|
| 1             | SO <sub>2</sub> | 286.2                       | 6.69                                  | 4.27                                     | 69.6               | 1.65                         |
| 2             |                 | 283.3                       | 6.62                                  | 5.91                                     | 69.0               | 2.46                         |
| 3             |                 | 283.8                       | 6.63                                  | 6.17                                     | 69.0               | 0.99                         |
| 4             |                 | 289.9                       | 6.78                                  | 6.30                                     | 69.0               | 1.52                         |
| 5             |                 | 575.5                       | 13.45                                 | 6.20                                     | 69.0               | 1.07                         |
| 6             |                 | 575.2                       | 13.44                                 | 6.08                                     | 69.0               | 2.45                         |
| 7             |                 | 583.5                       | 13.64                                 | 6.15                                     | 69.0               | 1.62                         |
| 8             |                 | 868.6                       | 20.30                                 | 6.23                                     | 69.0               | 2.22                         |
| 9             |                 | 874.7                       | 20.45                                 | 6.05                                     | 69.0               | 1.57                         |
| 10            |                 | 868.9                       | 20.31                                 | 6.32                                     | 69.0               | 0.97                         |
| 11            |                 | 454.9                       | 10.63                                 | 7.77                                     | 69.0               | 0.96                         |
| 12            |                 | 450.2                       | 10.52                                 | 8.16                                     | 69.0               | 2.17                         |
| 13            |                 | 450.7                       | 10.53                                 | 6.58                                     | 69.0               | 1.41                         |
| 14            |                 | 737.9                       | 17.25                                 | 8.32                                     | 69.0               | 0.88                         |
| 15            |                 | 746.8                       | 17.46                                 | 7.77                                     | 69.0               | 2.20                         |
| 16            |                 | 747.0                       | 17.46                                 | 9.38                                     | 69.0               | 1.50                         |
| 17            |                 | 204.0                       | 4.77                                  | 2.62                                     | 34.4               | 2.11                         |
| 18            |                 | 201.9                       | 4.72                                  | 3.00                                     | 34.4               | 1.32                         |
| 19            |                 | 196.9                       | 4.60                                  | 2.90                                     | 34.4               | 0.94                         |
| 20            |                 | 282.6                       | 6.61                                  | 6.07                                     | 34.4               | 0.79                         |
| 21            |                 | 572.9                       | 13.39                                 | 6.11                                     | 34.4               | 0.82                         |
| 22            |                 | 908.6                       | 21.24                                 | 6.08                                     | 34.4               | 0.78                         |
| 23            |                 | 204.7                       | 4.78                                  | 4.47                                     | 43.7               | 0.86                         |
| 24            |                 | 402.8                       | 9.41                                  | 5.47                                     | 47.4               | 2.14                         |
| 25            |                 | 459.9                       | 10.75                                 | 5.34                                     | 54.0               | 1.91                         |
| 26            |                 | 840.2                       | 19.64                                 | 9.82                                     | 111.5              | 1.74                         |
| 27            |                 | 262.7                       | 6.14                                  | 8.23                                     | 70.9               | 2.27                         |
| 28            |                 | 430.8                       | 10.07                                 | 8.19                                     | 70.6               | 2.23                         |
| 29            |                 | 260.1                       | 6.08                                  | 13.17                                    | 69.6               | 2.38                         |
| 30            |                 | 511.4                       | 11.95                                 | 19.39                                    | 125.5              | 2.61                         |

| Experiment ID | Species | Initial concentration (ppb) | $\text{OHR}_{\text{ext}} \text{ (s}^{-1}\text{)}$ | Input $\text{O}_3$ concentration (ppm) | Residence time (s) | Water vapor mixing ratio (%) |
|---------------|---------|-----------------------------|---------------------------------------------------|----------------------------------------|--------------------|------------------------------|
| 31            | CO      | 4909.4                      | 29.02                                             | 3.15                                   | 19.8               | 0.91                         |
| 32            |         | 4685.6                      | 27.70                                             | 5.06                                   | 37.4               | 0.83                         |
| 33            |         | 4958.3                      | 29.31                                             | 4.13                                   | 47.1               | 0.78                         |
| 34            |         | 4829.8                      | 28.55                                             | 5.59                                   | 69.4               | 2.20                         |
| 35            |         | 4358.0                      | 25.76                                             | 2.95                                   | 34.5               | 1.78                         |
| 36            |         | 5034.5                      | 29.76                                             | 4.82                                   | 46.8               | 2.18                         |
| 37            |         | 4438.5                      | 26.24                                             | 12.95                                  | 95.2               | 2.25                         |

**Table S3:** In OFR185 mode, the parameters  $a$ – $f$  for the  $\text{OH}_{\text{exp, est}}$  estimation were obtained from different data sets.

| OFR185                              | Figure # | Data sets                       | FP                                        | Coefficient |         |           |          |           |         |
|-------------------------------------|----------|---------------------------------|-------------------------------------------|-------------|---------|-----------|----------|-----------|---------|
|                                     |          |                                 |                                           | a           | b       | c         | d        | e         | f       |
| Residence time                      | Fig. 1a1 | short t                         | $\text{FP}_{\text{st}, 185}$              | 4.2566      | 0.57973 | -0.062233 | 0.47836  | 0.0027988 | 0.55255 |
|                                     | Fig. 1a2 | adding long t                   |                                           |             |         |           |          |           |         |
|                                     | Fig. 1a3 |                                 | $\text{FP}_{\text{et}, 185}$              | 4.5772      | 0.58603 | -0.10617  | 0.40819  | 0.004321  | 0.50352 |
| Water vapor mixing ratio            | Fig. 1b1 | low H <sub>2</sub> O            | $\text{FP}_{\text{IH}_2\text{O}, 185}$    | 5.5822      | 0.62134 | -0.23848  | 0.27915  | 0.0071196 | 0.42689 |
|                                     | Fig. 1b2 | adding high H <sub>2</sub> O    |                                           |             |         |           |          |           |         |
|                                     | Fig. 1b3 |                                 | $\text{FP}_{\text{eH}_2\text{O}, 185}$    | 4.2899      | 0.70966 | -0.21378  | 0.23242  | 0.0052289 | 0.39371 |
| Output O <sub>3</sub> concentration | Fig. 1c1 | low O <sub>3, out</sub>         | $\text{FP}_{\text{IO}_3, 185}$            | 3.3154      | 2.3046  | -1.74     | 0.033076 | 0.0061601 | 0.29402 |
|                                     | Fig. 1c2 | adding high O <sub>3, out</sub> |                                           |             |         |           |          |           |         |
|                                     | Fig. 1c3 |                                 | $\text{FP}_{\text{eO}_3, 185}$            | 3.5229      | 2.2995  | -1.7422   | 0.027553 | 0.0050063 | 0.29182 |
| External OHR                        | Fig. 2a  | low OHR <sub>ext</sub>          | $\text{FP}_{\text{IOHR}, 185}$            | 3.2404      | 0.74398 | -0.13922  | 0.26786  | 0.0026332 | 0.4917  |
|                                     | Fig. 2b  | adding high OHR <sub>ext</sub>  |                                           |             |         |           |          |           |         |
|                                     | Fig. 2c  |                                 | $\text{FP}_{\text{eOHR}, 185}$            | 3.5103      | 0.62481 | -0.079114 | 0.36805  | 0.0041654 | 0.38722 |
| OHR source                          | Fig. 3a  | SO <sub>2</sub>                 | $\text{FP}_{\text{SO}_2, 185}$            | 3.2759      | 0.65745 | -0.10638  | 0.23087  | 0.0050212 | 0.24198 |
|                                     | Fig. 3b  | CO                              | $\text{FP}_{\text{CO}, 185}$              | 4.1575      | 0.55935 | -0.86966  | -0.17843 | 0.089848  | -0.2993 |
|                                     | Fig. 3c  | SO <sub>2</sub> + CO            | $\text{FP}_{\text{SO}_2\&\text{CO}, 185}$ | 2.1665      | 0.78424 | -0.13214  | 0.089098 | 0.0036945 | 0.03358 |

**Table S4:** In OFR254 mode, the parameters  $a$ – $c$  of the  $\text{OH}_{\text{exp, est}}$  estimation were obtained from different data sets.

| OFR254                           | Figure # | Data sets                             | FP                                        | Coefficient |         |          |
|----------------------------------|----------|---------------------------------------|-------------------------------------------|-------------|---------|----------|
|                                  |          |                                       |                                           | a           | b       | c        |
| External OHR                     | Fig. 4a1 | low $\text{OHR}_{\text{ext}}$         | $\text{FP}_{\text{IOHR}, 254}$            | 12.798      | 0.34588 | 0.085063 |
|                                  | Fig. 4a2 | adding high $\text{OHR}_{\text{ext}}$ | $\text{FP}_{\text{eOHR}, 254}$            | 13.151      | -17.172 | 0.12986  |
|                                  | Fig. 4a3 |                                       |                                           |             |         |          |
| Input $\text{O}_3$ concentration | Fig. 4b1 | low $\text{O}_{3, \text{in}}$         | $\text{FP}_{\text{IO}_3, 254}$            | 13.459      | -19.285 | 0.11153  |
|                                  | Fig. 4b2 | adding high $\text{O}_{3, \text{in}}$ | $\text{FP}_{\text{eO}_3, 254}$            | 13.325      | -19.393 | 0.12029  |
|                                  | Fig. 4b3 |                                       |                                           |             |         |          |
| $r_{\text{O}_3}$                 | Fig. 4c1 | medium $r_{\text{O}_3}$               | $\text{FP}_{\text{mrO}_3, 254}$           | 12.989      | -9.9122 | 0.13684  |
|                                  | Fig. 4c2 | adding extended $r_{\text{O}_3}$      | $\text{FP}_{\text{erO}_3, 254}$           | 13.213      | -18.921 | 0.13111  |
|                                  | Fig. 4c3 |                                       |                                           |             |         |          |
| OHR source                       | Fig. 5a  | $\text{SO}_2$                         | $\text{FP}_{\text{SO}_2, 254}$            | 13.145      | -18.669 | 0.13316  |
|                                  | Fig. 5b  | $\text{CO}$                           | $\text{FP}_{\text{CO}, 254}$              | 16.161      | -92.945 | 0.11466  |
|                                  | Fig. 5c  | $\text{SO}_2 + \text{CO}$             | $\text{FP}_{\text{SO}_2\&\text{CO}, 254}$ | 13.075      | -15.698 | 0.13741  |

Figures.

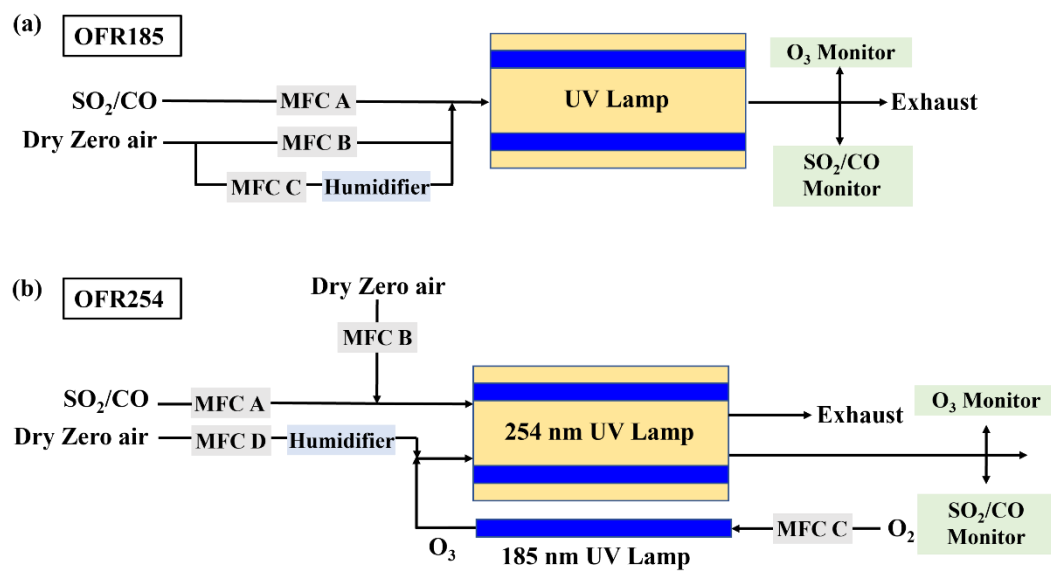

**Figure S1:** The schematics of the PAM-OFR experimental setup for trace-gas decay experiments in (a) OFR185 mode and (b) OFR254 mode.

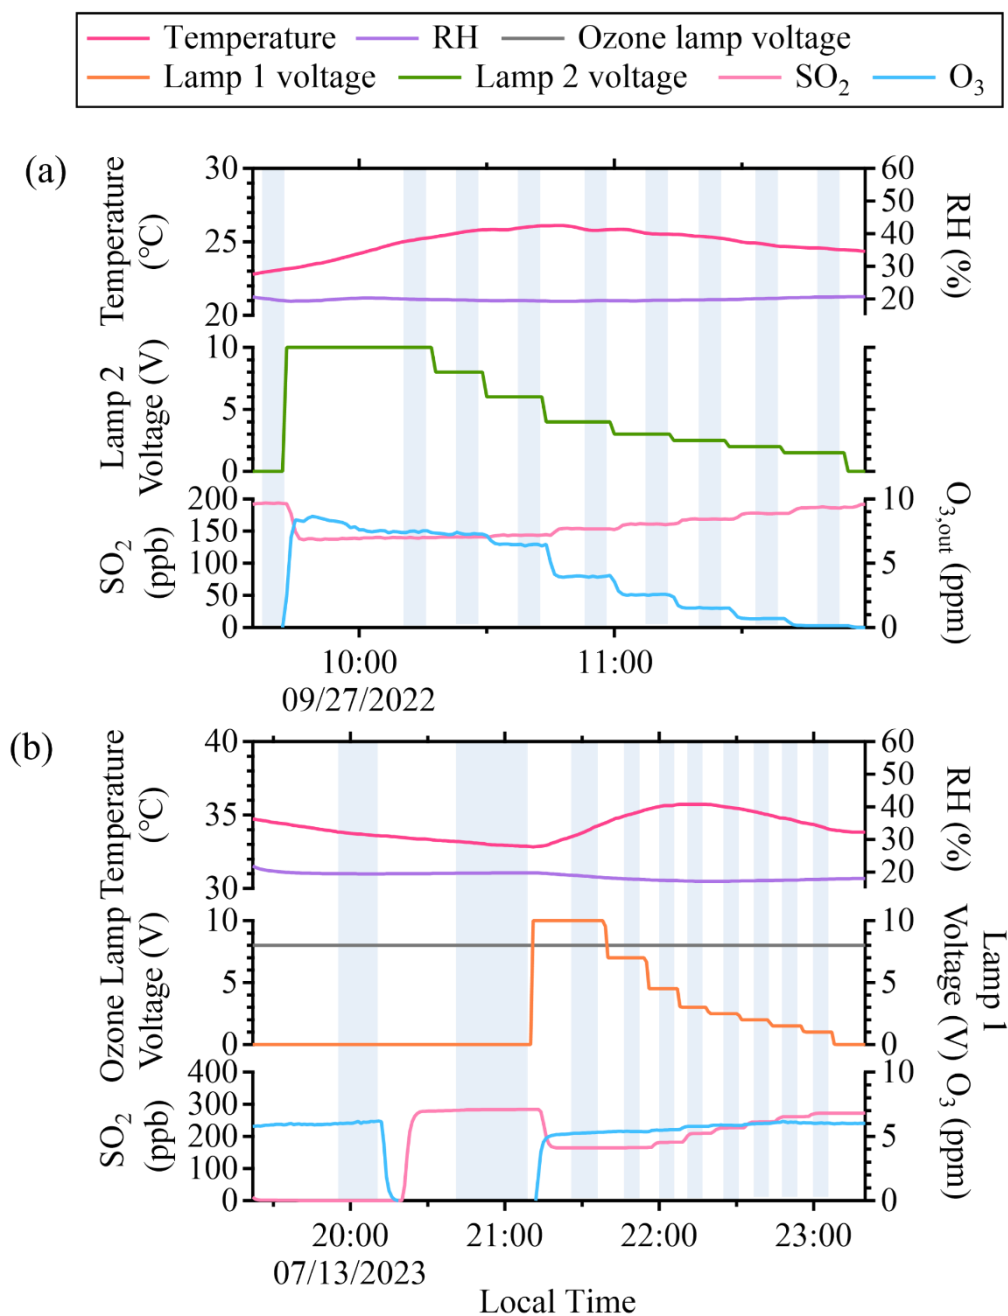

**Figure S2:** The examples of a set of experiments conducted in (a) the OFR185 mode and (b) the OFR254 mode, respectively. A set of experiments was operated with light voltage settings stepping decreasing from 10V to 0V. The highlighted areas indicate the periods when all conditions had reached a steady state and the tracer gas was sampled.

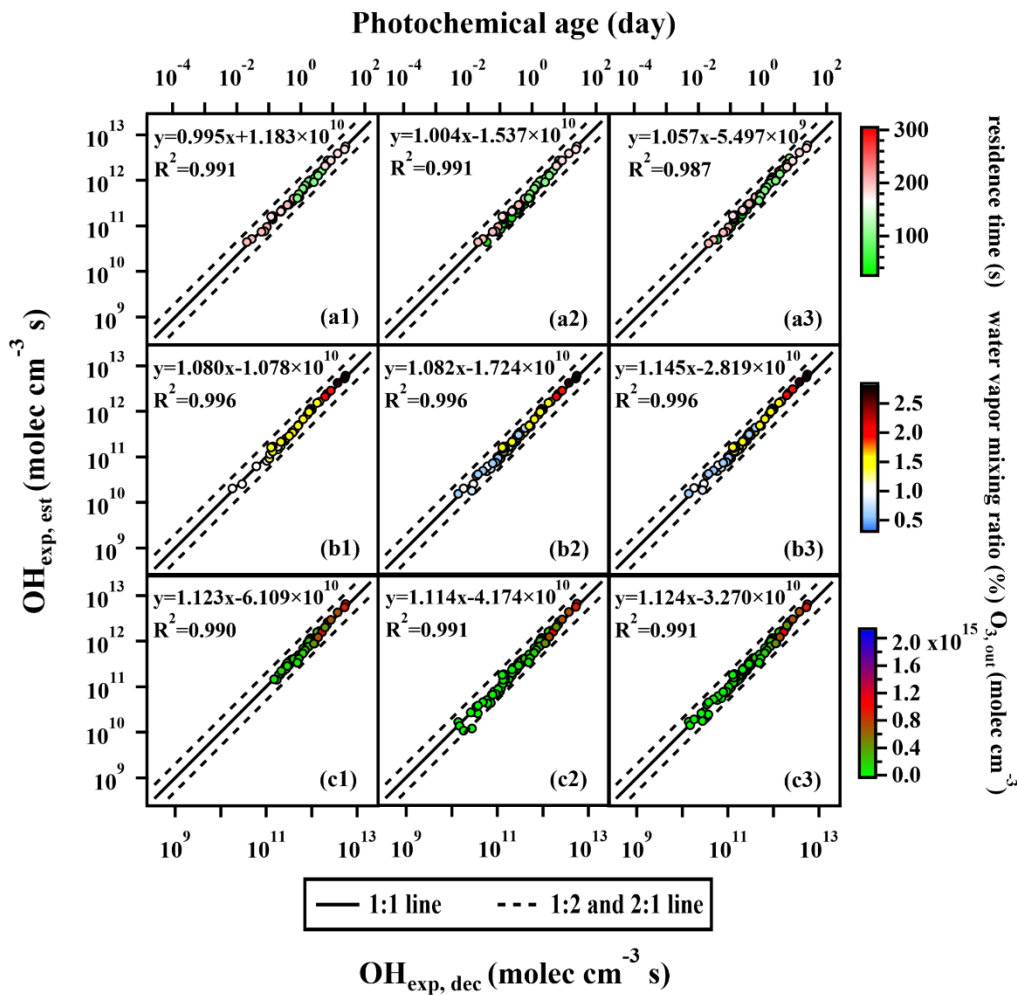

**Figure S3:** The regression results of  $OH_{exp, est}$  and  $OH_{exp, dec}$  when variations occurred in (a1–a3) residence time, (b1–b3) water vapor mixing ratio, and (c1–c3) output  $O_3$  concentration under atmospheric relevant  $OHR_{ext}$  level ( $4\text{--}23\ s^{-1}$ ). Compared to panels a1, b1, and c1, panels a2, b2, and c2 respectively incorporated additional data points with lower  $t$ ,  $H_2O$ , and  $O_{3, out}$  values, but still utilized the fitting parameters  $a\text{--}f$  obtained from the higher condition range to estimate  $OH_{exp, est}$ . In panels a3, b3, and c3, all data points within the extended condition range were used to re-fit the parameters  $a\text{--}f$ , which were employed to estimate  $OH_{exp, est}$ .

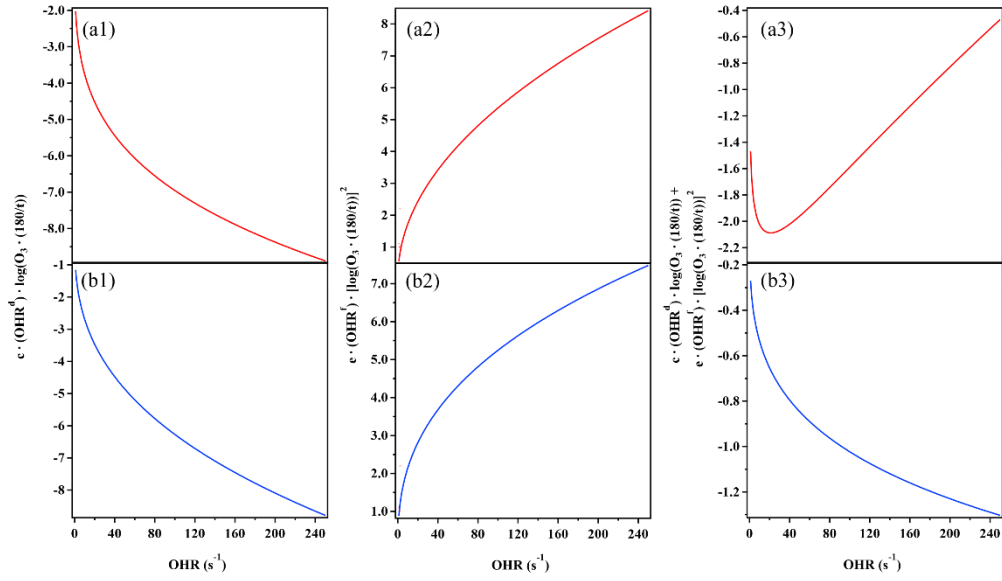

**Figure S4:** (a1–a3) The variations of  $c \times \text{OHR}_{\text{ext}}^d \times \log(\text{O}_{3, \text{out}} \times 180/t)$ ,  $e \times \text{OHR}_{\text{ext}}^f \times [\log(\text{O}_{3, \text{out}} \times 180/t)]^2$  and their sum with respect to  $\text{OHR}_{\text{ext}}$  when using the fitted values of  $c-f$  (-0.13922, 0.26786, 0.0026332, 0.4917) obtained from the low  $\text{OHR}_{\text{ext}}$  data points. (b1–b3) The variations of  $c \times \text{OHR}_{\text{ext}}^d \times \log(\text{O}_{3, \text{out}} \times 180/t)$ ,  $e \times \text{OHR}_{\text{ext}}^f \times [\log(\text{O}_{3, \text{out}} \times 180/t)]^2$  and their sum with respect to  $\text{OHR}_{\text{ext}}$  when using the fitted values of  $c-f$  (-0.079114, 0.36805, 0.0041654, 0.38722) obtained from the data points with a wider range of  $\text{OHR}_{\text{ext}}$  condition.
